# Supplementary material for: Molecular phylogeny of Panicum s. str. (Poaceae, Panicoideae, Paniceae) and insights into its biogeography and evolution
Source: PubMed Central journal article supplement (PMC5842878; doi:10.1371/journal.pone.0191529), 2018-02-21

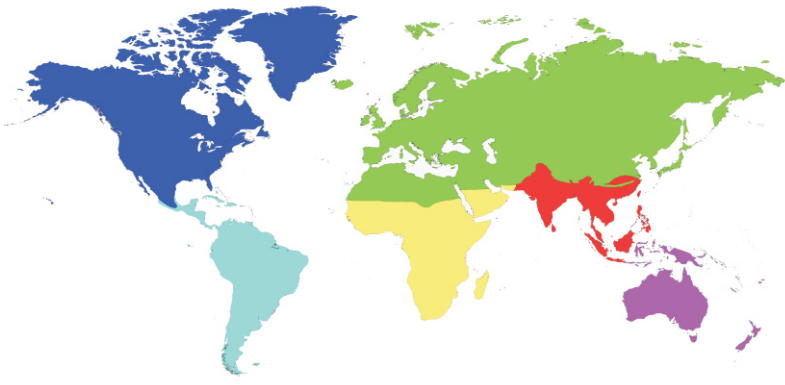

- A** North America
- B** Neotropics
- C** Eurasia
- D** Sub-Saharan Africa
- E** Southeast Asia
- F** Australia

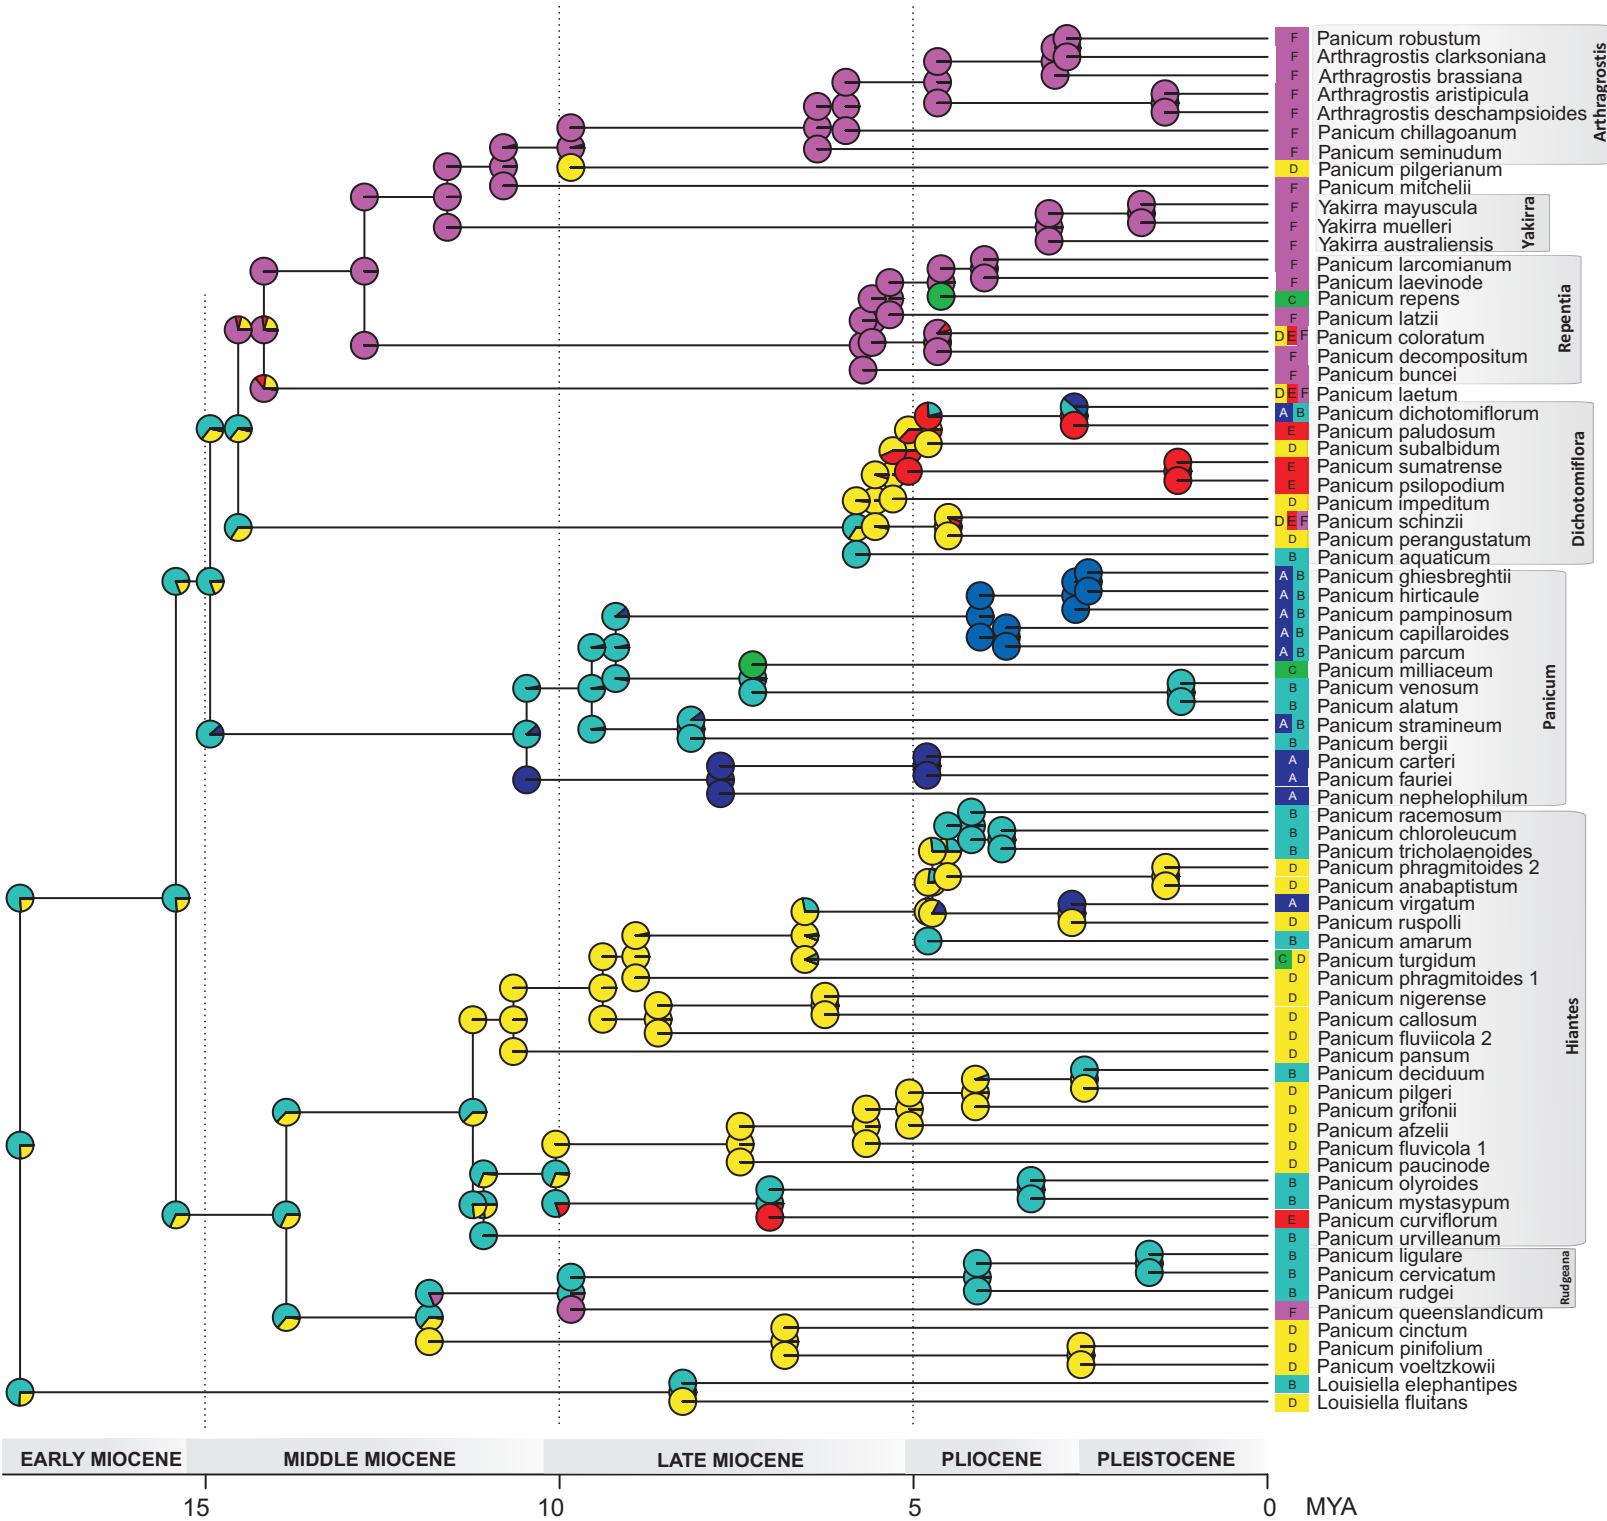

Supplement: pone.0191529.s006.pdf [file pone.0191529.s006.pdf]
